# Supplementary material for: Generative Artificial Intelligence Integration in Medical Education: A Cross-Sectional Survey of Medical Students’ Perceptions and Attitudes in Saudi Arabia
Source: Research Square preprint supplement (doi:10.21203/rs.3.rs-6222830/v1), 2025-05-16
Supplement: Supplementary file 1 [file f92985c428136bd851dc9e63.pdf]

We are a group of researchers from King Saud University. We are looking for your participation by filling this questionnaire to facilitate our survey study for the Artificial Intelligence role in medical education from medical students prospect.

Your participation will be anonymous and the entered data will be treated confidentially. By accepting participation, you consent approval of participation.

1. Age
2. Gender: Male ☐ Female ☐
3. College of medicine: Undergraduate: Clinical years ☐ Non-clinical years ☐
4. Postgraduate speciality
5. College: College of medicine ☐ College of nursing ☐ College of Pharmacy ☐  
College of nursing ☐ College of Dentistry ☐ College of Applied Health Sciences ☐
6. University: King Saud University ☐ Alfaisal University ☐ Almaarefah University  
Imam Mohammad Bin Saud University ☐
7. How do you rate your computer skills? Excellent ☐ Good ☐ Fair ☐ Poor ☐
8. Are AI platforms easily accessible for you? Yes ☐ No ☐
9. Are you familiar with any role of AI in medical education? Yes ☐ No ☐
10. Do you think AI would improve medical education future? Yes ☐ No ☐ Neutral ☐
11. Which of the following is a potential benefit of AI in medical education (choose all what applies)  
Clinical sciences (eg. Internal medicine, OB/Gyne) ☐ Basic sciences (eg. Physiology, Anatomy) ☐ Simulation (Clinical scenarios) ☐ Skills (eg. Physical examination, surgical) ☐ Assignments and HomeWorks ☐
12. Do you think AI as a tutor would be more efficient/systematic and informative than human tutor for clinical teaching especially skills? Yes ☐ No ☐ Neutral ☐
13. Do you think AI versus human tutor would be more fair and objective in their assessment of medical students? Yes ☐ No ☐ Neutral ☐
14. Would you like your medical school to incorporate AI in their teaching methodology? Yes ☐ No ☐ Neutral ☐
15. Do you think AI is a reliable source of information for medical students? Yes ☐ No ☐ Neutral ☐
16. Do you think medical students' usage of AI platforms in assignments completions is ethical? Yes ☐ No ☐ Neutral ☐
17. Do you think AI platforms are Not inferior to traditional methods of medical education (eg. lectures and practical sessions, interactive sessions)? Yes ☐ No ☐ Neutral ☐
18. Do you think AI platforms would be a contributing factor for improving medical students' academic achievement (grades)? Yes ☐ No ☐ Neutral ☐
19. Do you think accessibility of medical students to AI platform would affect their future competencies as physicians? Yes ☐ No ☐ Neutral ☐
20. Do you think AI will improve medical practice? Yes ☐ No ☐ Neutral ☐
21. Do you think AI will improve patients' care? Yes ☐ No ☐ Neutral ☐
22. Do you think AI might replace some of the medical specialities in the future? Yes ☐  
No ☐ Neutral ☐
